# Supplementary material for: Quantifying the effects of ice hockey upper body pads on mobility and comfort
Source: PubMed Central journal article supplement (PMC10758976; doi:10.1016/j.isci.2023.108606), 2023-11-30
Supplement: mmc1.pdf [file mmc1.pdf]

**iScience, Volume 27**

**Supplemental information**

**Quantifying the effects of ice hockey  
upper body pads on mobility and comfort**

**Yiwei Wu, Yanfei Shen, Yinsheng Tian, Qi Chen, and Lixin Sun**

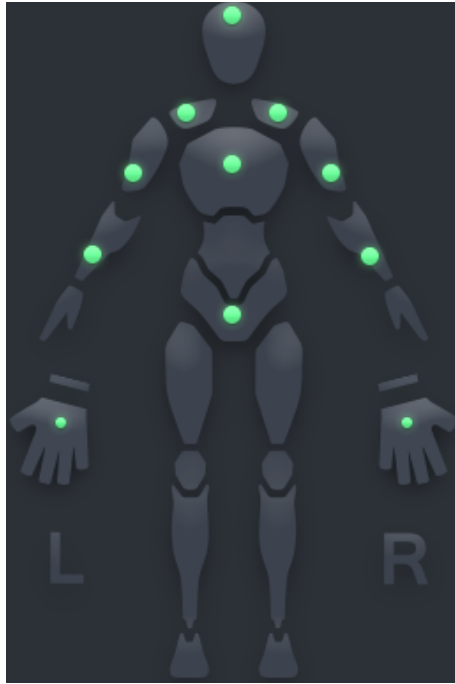

**Figure S1.** Placements of 11 IMUs on a participant. (Related to STAR Methods)

These IMUs were attached and strapped to each body segment of the head (1), shoulders (2), upper spine (1), lower spine (1), upper arms (2), forearms (2), and hands (2).

L, left; R, right; IMUs, inertial measurement units.

**Table S1.** Results of the post-hoc pairwise comparison of one-way repeated measures ANOVA between (i.e., p-value) S/EPs during all investigated static tasks. (Related to Table 1)

| Variables   |             | Shoulder |        |        |        |         | Elbow   |        |        |        |
|-------------|-------------|----------|--------|--------|--------|---------|---------|--------|--------|--------|
|             |             | Flex     | Ext    | Add    | Abd    | Int Rot | Ext Rot | Flex   | Pro    | Sup    |
| No S/EPs    | Bauer Vapor | < 0.01   | 0.015  | 0.068  | 0.026  | 0.019   | 0.093   | < 0.01 | < 0.01 | < 0.01 |
|             | Bauer Nsx   | < 0.01   | 0.124  | 0.194  | < 0.01 | < 0.01  | < 0.01  | < 0.01 | 0.016  | 0.169  |
|             | Vik-Max     | < 0.01   | < 0.01 | < 0.01 | < 0.01 | < 0.01  | < 0.01  | < 0.01 | < 0.01 | 0.026  |
|             | Heilong     | < 0.01   | < 0.01 | 0.023  | < 0.01 | < 0.01  | < 0.01  | < 0.01 | < 0.01 | < 0.01 |
|             | IBX         | < 0.01   | 0.020  | < 0.01 | 0.010  | < 0.01  | < 0.01  | < 0.01 | < 0.01 | < 0.01 |
| Bauer Vapor | Bauer Nsx   | 0.844    | 0.334  | 0.586  | 0.582  | 0.489   | 0.158   | 1.000  | 0.689  | 0.123  |
|             | Vik-Max     | 0.919    | 0.724  | 0.161  | 0.019  | < 0.01  | 0.023   | 0.288  | 0.752  | 0.513  |
|             | Heilong     | 0.377    | 0.230  | 0.624  | 0.010  | < 0.01  | 0.179   | 1.000  | 0.948  | 0.799  |
|             | IBX         | 0.583    | 0.898  | 0.170  | 0.672  | 0.033   | 0.096   | 1.000  | 0.329  | 0.912  |
| Bauer Nsx   | Vik-Max     | 0.767    | 0.190  | 0.054  | 0.067  | 0.012   | 0.364   | 1.000  | 0.475  | 0.366  |
|             | Heilong     | 0.282    | 0.034  | 0.303  | 0.038  | 0.029   | 0.943   | 1.000  | 0.641  | 0.075  |
|             | IBX         | 0.724    | 0.401  | 0.058  | 0.897  | 0.139   | 0.791   | 1.000  | 0.172  | < 0.01 |
| Vik-Max     | Heilong     | 0.433    | 0.393  | 0.356  | 0.796  | 0.723   | 0.328   | 1.000  | 0.802  | 0.365  |
|             | IBX         | 0.516    | 0.631  | 0.975  | 0.051  | 0.271   | 0.519   | 0.519  | 0.507  | 0.445  |
| Heilong     | IBX         | 0.156    | 0.185  | 0.372  | 0.029  | 0.452   | 0.737   | 1.000  | 0.362  | 0.885  |

S/EPs; shoulder and elbow pads; ROM, range of motion; ANOVA, analysis of variance; Flex, flexion; Ext, extension; Add, adduction; Abd, abduction; Int Rot, internal rotation; Ext Rot, external rotation; Pro, pronation; Sup, supination.

**Table S2.** Results of the post-hoc pairwise comparison of one-way repeated measures ANOVA between (i.e., p-value) S/EPs during the wrist shot. (Related to Related to Table 2)

| Variables   |             | Shoulder   |           |               |            |           |               | Elbow  |           |        |           |
|-------------|-------------|------------|-----------|---------------|------------|-----------|---------------|--------|-----------|--------|-----------|
|             |             | Flex/Ext L | Add/Abd L | Int/Ext Rot L | Flex/Ext R | Add/Abd R | Int/Ext Rot R | Flex L | Pro/Sup L | Flex R | Pro/Sup R |
| No S/EPs    | Bauer Vapor | < 0.01     | 0.641     | 0.411         | 0.015      | 0.714     | 0.088         | < 0.01 | 0.232     | 0.475  | 0.630     |
|             | Bauer Nsx   | < 0.01     | 0.488     | 0.333         | < 0.01     | 0.063     | 0.213         | < 0.01 | 0.789     | 0.251  | 0.699     |
|             | Vik-Max     | 0.018      | 0.183     | 0.196         | < 0.01     | 0.949     | 0.016         | < 0.01 | 0.376     | 0.145  | 0.664     |
|             | Heilong     | 0.433      | 0.495     | 0.926         | 0.046      | 0.350     | 0.936         | < 0.01 | 0.061     | 0.708  | 0.863     |
|             | IBX         | 0.215      | 0.396     | 0.094         | 0.017      | 0.904     | 0.766         | 0.178  | 0.118     | 0.725  | 0.574     |
| Bauer Vapor | Bauer Nsx   | 0.656      | 0.819     | 0.882         | 0.619      | 0.129     | 0.634         | 0.479  | 0.350     | 0.660  | 0.925     |
|             | Vik-Max     | 0.649      | 0.381     | 0.630         | 0.758      | 0.666     | 0.446         | 0.696  | 0.750     | 0.449  | 0.362     |
|             | Heilong     | 0.040      | 0.828     | 0.465         | 0.628      | 0.567     | 0.075         | 0.626  | 0.478     | 0.279  | 0.757     |
|             | IBX         | 0.105      | 0.700     | 0.382         | 0.949      | 0.805     | 0.047         | 0.039  | 0.704     | 0.289  | 0.936     |
| Bauer Nsx   | Vik-Max     | 0.369      | 0.516     | 0.739         | 0.850      | 0.055     | 0.218         | 0.750  | 0.536     | 0.749  | 0.412     |
|             | Heilong     | 0.014      | 0.991     | 0.380         | 0.329      | 0.335     | 0.186         | 0.235  | 0.104     | 0.131  | 0.829     |
|             | IBX         | 0.041      | 0.875     | 0.467         | 0.576      | 0.080     | 0.125         | 0.162  | 0.192     | 0.137  | 0.861     |
| Vik-Max     | Heilong     | 0.104      | 0.508     | 0.229         | 0.430      | 0.319     | 0.013         | 0.382  | 0.306     | 0.070  | 0.545     |
|             | IBX         | 0.238      | 0.621     | 0.692         | 0.710      | 0.854     | < 0.01        | 0.089  | 0.486     | 0.073  | 0.322     |
| Heilong     | IBX         | 0.643      | 0.866     | 0.113         | 0.674      | 0.414     | 0.828         | 0.012  | 0.741     | 0.982  | 0.696     |

S/EPs; shoulder and elbow pads; ANOVA, analysis of variance; Flex/Ext L, flexion/extension left; Add/Abd L, adduction/abduction left; Int/Ext Rot L, internal/external rotation left; Flex/Ext R, flexion/extension right; Add/Abd R, adduction/abduction right; Int/Ext Rot R, internal/external rotation right; Flex L, flexion left; Pro/Sup L, pronation/supination left; Flex R, flexion right; Pro/Sup R, pronation/supination right.

**Table S3.** Results of the post-hoc pairwise comparison of one-way repeated measures ANOVA between (i.e., p-value) S/EPs during the SI to ST of a slap shot. (Related to Table 3)

| Variables   |             | Shoulder   |           |               |            |           |               | Elbow  |           |        |           |
|-------------|-------------|------------|-----------|---------------|------------|-----------|---------------|--------|-----------|--------|-----------|
|             |             | Flex/Ext L | Add/Abd L | Int/Ext Rot L | Flex/Ext R | Add/Abd R | Int/Ext Rot R | Flex L | Pro/Sup L | Flex R | Pro/Sup R |
| No S/EPs    | Bauer Vapor | 0.348      | 0.778     | 0.938         | 0.522      | 0.492     | 0.854         | 0.212  | 0.037     | 0.145  | 0.536     |
|             | Bauer Nsx   | 0.087      | 0.529     | 0.188         | 0.189      | 0.880     | 0.282         | < 0.01 | 0.014     | 0.813  | 0.949     |
|             | Vik-Max     | 0.332      | 0.025     | 0.806         | 0.164      | 0.437     | < 0.01        | < 0.01 | 0.134     | 0.902  | 0.773     |
|             | Heilong     | 0.097      | 0.807     | 0.156         | < 0.01     | 0.145     | < 0.01        | < 0.01 | < 0.01    | 0.609  | 0.984     |
|             | IBX         | 0.936      | 0.077     | 0.609         | 0.855      | 0.093     | 0.073         | < 0.01 | 0.227     | 0.906  | 0.765     |
| Bauer Vapor | Bauer Nsx   | 0.427      | 0.728     | 0.164         | 0.494      | 0.403     | 0.210         | 0.139  | 0.685     | 0.220  | 0.578     |
|             | Vik-Max     | 0.975      | 0.047     | 0.746         | 0.446      | 0.928     | < 0.01        | 0.074  | 0.535     | 0.116  | 0.366     |
|             | Heilong     | 0.458      | 0.969     | 0.135         | 0.017      | 0.433     | < 0.01        | 0.064  | 0.160     | 0.339  | 0.549     |
|             | IBX         | 0.390      | 0.134     | 0.556         | 0.646      | 0.309     | 0.049         | < 0.01 | 0.359     | 0.179  | 0.748     |
| Bauer Nsx   | Vik-Max     | 0.445      | 0.097     | 0.281         | 0.936      | 0.355     | 0.109         | 0.744  | 0.307     | 0.719  | 0.726     |
|             | Heilong     | 0.958      | 0.699     | 0.916         | 0.077      | 0.109     | 0.114         | 0.695  | 0.313     | 0.783  | 0.965     |
|             | IBX         | 0.102      | 0.246     | 0.414         | 0.256      | 0.068     | 0.458         | 0.141  | 0.189     | 0.905  | 0.814     |
| Vik-Max     | Heilong     | 0.476      | 0.043     | 0.238         | 0.091      | 0.487     | 0.984         | 0.947  | 0.046     | 0.526  | 0.758     |
|             | IBX         | 0.373      | 0.604     | 0.790         | 0.2248     | 0.354     | 0.379         | 0.247  | 0.764     | 0.810  | 0.558     |
| Heilong     | IBX         | 0.113      | 0.125     | 0.357         | < 0.015    | 0.814     | 0.390         | 0.275  | 0.023     | 0.693  | 0.780     |

S/EPs; shoulder and elbow pads; ANOVA, analysis of variance; SI, shot initiation; ST, swing top; Flex/Ext L, flexion/extension left; Add/Abd L, adduction/abduction left; Int/Ext Rot L, internal/external rotation left; Flex/Ext R, flexion/extension right; Add/Abd R, adduction/abduction right; Int/Ext Rot R, internal/external rotation right; Flex L, flexion left; Pro/Sup L, pronation/supination left; Flex R, flexion right; Pro/Sup R, pronation/supination right.

**Table S4.** Results of the post-hoc pairwise comparison of one-way repeated measures ANOVA between (i.e., p-value) S/EPs during the ST to SR of a slap shot. (Related to Table 3)

| Variables   |             | Shoulder   |           |               |            |           |               | Elbow  |           |        |           |
|-------------|-------------|------------|-----------|---------------|------------|-----------|---------------|--------|-----------|--------|-----------|
|             |             | Flex/Ext L | Add/Abd L | Int/Ext Rot L | Flex/Ext R | Add/Abd R | Int/Ext Rot R | Flex L | Pro/Sup L | Flex R | Pro/Sup R |
| No S/EPs    | Bauer Vapor | < 0.01     | 0.911     | 0.656         | 0.916      | 0.015     | 0.453         | 0.017  | 0.424     | 0.089  | 0.114     |
|             | Bauer Nsx   | 0.204      | 0.312     | 0.105         | 0.568      | 0.0307    | 0.641         | 0.192  | 0.196     | 0.978  | 0.922     |
|             | Vik-Max     | 0.210      | 0.987     | 0.057         | 0.987      | 0.021     | < 0.01        | < 0.01 | 0.762     | 0.682  | 0.509     |
|             | Heilong     | 0.140      | 0.576     | < 0.01        | 0.118      | < 0.01    | 0.242         | < 0.01 | 0.170     | 0.897  | 0.923     |
|             | IBX         | 0.432      | 0.436     | 0.160         | 0.308      | 0.021     | < 0.01        | < 0.01 | 0.938     | 0.381  | 0.404     |
| Bauer Vapor | Bauer Nsx   | 0.069      | 0.367     | 0.234         | 0.499      | 0.773     | 0.775         | 0.253  | 0.612     | 0.094  | 0.137     |
|             | Vik-Max     | 0.067      | 0.899     | 0.138         | 0.904      | 0.899     | 0.037         | 0.792  | 0.273     | 0.191  | 0.348     |
|             | Heilong     | 0.106      | 0.654     | 0.012         | 0.096      | 0.416     | 0.669         | 0.213  | 0.557     | 0.115  | 0.137     |
|             | IBX         | 0.023      | 0.504     | 0.331         | 0.2614     | 0.906     | 0.038         | 0.651  | 0.381     | 0.397  | 0.445     |
| Bauer Nsx   | Vik-Max     | 0.985      | 0.304     | 0.762         | 0.579      | 0.871     | 0.019         | 0.162  | 0.114     | 0.702  | 0.575     |
|             | Heilong     | 0.831      | 0.647     | 0.159         | 0.311      | 0.273     | 0.476         | 0.020  | 0.935     | 0.918  | 0.999     |
|             | IBX         | 0.621      | 0.813     | 0.822         | 0.649      | 0.864     | 0.019         | 0.114  | 0.171     | 0.396  | 0.460     |
| Vik-Max     | Heilong     | 0.816      | 0.565     | 0.265         | 0.121      | 0.349     | 0.090         | 0.323  | 0.097     | 0.779  | 0.573     |
|             | IBX         | 0.635      | 0.427     | 0.598         | 0.315      | 0.993     | 0.991         | 0.851  | 0.822     | 0.638  | 0.859     |
| Heilong     | IBX         | 0.480      | 0.824     | 0.104         | 0.573      | 0.353     | 0.092         | 0.422  | 0.148     | 0.454  | 0.460     |

S/EPs; shoulder and elbow pads; ANOVA, analysis of variance; SR, shot release; ST, swing top; Flex/Ext L, flexion/extension left; Add/Abd L, adduction/abduction left; Int/Ext Rot L, internal/external rotation left; Flex/Ext R, flexion/extension right; Add/Abd R, adduction/abduction right; Int/Ext Rot R, internal/external rotation right; Flex L, flexion left; Pro/Sup L, pronation/supination left; Flex R, flexion right; Pro/Sup R, pronation/supination right.

**Table S5.** Subjective evaluation scores of different types of S/EPs during both static and dynamic tasks. (Related to Figure 5)

| <b>Variables</b>                                                            | <b>Bauer<br/>Vapor</b> | <b>Bauer<br/>Nsx</b> | <b>Vik-<br/>Max</b> | <b>Heilong</b> | <b>IBX</b> |
|-----------------------------------------------------------------------------|------------------------|----------------------|---------------------|----------------|------------|
| This shoulder or elbow pad is comfortable                                   | 3.5 ± 0.7              | 3.6 ± 1.0            | 2.9 ± 0.8           | 2.3 ± 0.8      | 3.5 ± 1.0  |
| This shoulder or elbow pad is safe                                          | 4.3 ± 0.6              | 3.8 ± 1.1            | 2.8 ± 1.1           | 2.9 ± 1.2      | 3.8 ± 0.9  |
| This shoulder or elbow pad limits my shoulder or elbow motion               | 3.4 ± 0.9              | 3.7 ± 0.9            | 2.9 ± 0.7           | 2.3 ± 0.7      | 3.2 ± 0.7  |
| I would wear this specific shoulder or elbow pad if wearing one is optional | 3.7 ± 1.2              | 3.4 ± 1.2            | 2.3 ± 0.7           | 2.0 ± 0.9      | 3.6 ± 0.9  |

S/EPs; shoulder and elbow pads
